# Supplementary material for: A novel noninvasive method for remote heart failure monitoring: the EuleriAn video Magnification apPLications In heart Failure studY (AMPLIFY)
Source: Springer Nature journal article supplement (doi:10.1038/s41746-019-0159-0), 2019-08-21
Supplement: 41746_2019_159_MOESM2_ESM.pdf [file 41746_2019_159_MOESM2_ESM.pdf]

**Supplementary Table 1.** *Cardiologist bedside exam findings.* JVP = jugular venous pressure. NC = patient enrolled but right heart catheterization aborted or bedside assessment not completed.

| Patient ID | Invasive right atrial pressure (mmHg) | Bedside JVP Cardiologist 1(cm H <sub>2</sub> O) | Bedside JVP Cardiologist 2 (cm H <sub>2</sub> O) |
|------------|---------------------------------------|-------------------------------------------------|--------------------------------------------------|
| 1          | 5                                     | 10                                              | 5                                                |
| 2          | 9                                     | 15                                              | 15                                               |
| 3          | 7                                     | 5                                               | 6                                                |
| 4          | 3                                     | 6                                               | 10                                               |
| 5          | 8                                     | 6                                               | 6                                                |
| 6          | 9                                     | 6                                               | 7                                                |
| 7          | 4                                     | 5                                               | 5                                                |
| 8          | 7                                     | 5                                               | 6                                                |
| 9          | 11                                    | 8                                               | 9                                                |
| 10         | 8                                     | 5                                               | 6                                                |
| 11         | 3                                     | 7                                               | 0                                                |
| 12         | 7                                     | 5                                               | 5                                                |
| 13         | 10                                    | 6                                               | 6                                                |
| 14         | 10                                    | 7                                               | 6                                                |
| 15         | 5                                     | 5                                               | 6                                                |
| 16         | 8                                     | 5                                               | 6                                                |
| 17         | 13                                    | 10                                              | 4                                                |
| 18         | 15                                    | 12                                              | 15                                               |
| 19         | 7                                     | 8                                               | 7                                                |
| 20         | 2                                     | 6                                               | NC                                               |
| 21         | 3                                     | 10                                              | 7                                                |
| 22         | 22                                    | 15                                              | 6                                                |

|    |    |    |    |
|----|----|----|----|
| 23 | 8  | 8  | 8  |
| 24 | 8  | 5  | 7  |
| 25 | 3  | 6  | 5  |
| 26 | 6  | 5  | 7  |
| 27 | 8  | 6  | 7  |
| 28 | 10 | 5  | 5  |
| 29 | 5  | 6  | 5  |
| 30 | 8  | 10 | 2  |
| 31 | 4  | 8  | 3  |
| 32 | 17 | 15 | 15 |
| 33 | 4  | 5  | 6  |
| 34 | 10 | 4  | 10 |
| 35 | 9  | 5  | 0  |
| 36 | 5  | 7  | 5  |
| 37 | 11 | 8  | 8  |
| 38 | 16 | 8  | NC |
| 39 | 11 | 7  | 6  |
| 40 | 11 | 7  | 6  |
| 41 | 8  | 6  | NC |
| 42 | 10 | 1  | NC |
| 43 | 6  | 5  | 6  |
| 44 | 5  | 6  | 6  |
| 45 | 6  | 8  | 6  |
| 46 | 30 | 5  | 4  |
| 47 | 12 | 10 | 11 |
| 48 | 4  | 6  | 6  |

**Supplementary Table 2.** *Cardiologist video exam findings.* All data presented in cm H<sub>2</sub>O. NC = assessment not completed.

| ID | <u>Cardiologist 1</u> |           | <u>Cardiologist 2</u> |           | <u>Cardiologist 3</u> |           | <u>Cardiologist 4</u> |           | <u>Cardiologist 5</u> |           | <u>Cardiologist 6</u> |           | <u>Cardiologist 7</u> |           | <u>Cardiologist 8</u> |           | <u>Cardiologist 9</u> |           |
|----|-----------------------|-----------|-----------------------|-----------|-----------------------|-----------|-----------------------|-----------|-----------------------|-----------|-----------------------|-----------|-----------------------|-----------|-----------------------|-----------|-----------------------|-----------|
|    | Raw                   | Amplified | Raw                   | Amplified | Raw                   | Amplified | Raw                   | Amplified | Raw                   | Amplified | Raw                   | Amplified | Raw                   | Amplified | Raw                   | Amplified | Raw                   | Amplified |
| 1  | 8                     | 8         | 9                     | 9         | 6                     | 8         | 7                     | 7         | 7                     | 7         | 6                     | 8         | 7                     | 9         | 5                     | 5         | 9                     | 10        |
| 2  | 11                    | 12        | 12                    | 10        | 13                    | 13        | 11                    | 11        | 8                     | 8         | 13                    | 11        | 14                    | 15        | 10                    | 10        | 12                    | 18        |
| 3  | 5                     | 5         | 7                     | 7         | 7                     | 8         | 6                     | 6         | 6                     | 6         | NC                    | NC        | 5                     | 6         | 4                     | 4         | 8                     | 8         |
| 4  | 7                     | 7         | 10                    | 10        | 8                     | 11        | 8                     | 9         | 7                     | 7         | 9                     | 9         | 4                     | 7         | 7                     | 7         | 11                    | 11        |
| 5  | 7                     | 7         | 10                    | 12        | 7                     | 7         | 7                     | 7         | NC                    | NC        | 7                     | 8         | 2                     | 5         | 5                     | 5         | 9                     | 9         |
| 6  | 5                     | 5         | 7                     | 7         | 12                    | 12        | 6                     | 6         | 6                     | 7         | 6                     | 6         | 5                     | 5         | 5                     | 5         | 8                     | 9         |
| 7  | 5                     | 5         | 7                     | 7         | 5                     | 7         | 6                     | 6         | 6                     | 6         | 5                     | 6         | 2                     | 3         | 4                     | 4         | 8                     | 8         |
| 8  | 7                     | 7         | NC                    | 7         | 9                     | 9         | 7                     | 8         | 9                     | 10        | 7                     | 7         | 2                     | 5         | 8                     | 6         | 11                    | 11        |
| 9  | 10                    | 10        | 11                    | 13        | 11                    | 13        | 10                    | 12        | 10                    | 10        | 10                    | 11        | 5                     | 6         | 5                     | 5         | 13                    | 14        |
| 10 | 5                     | 5         | 12                    | 12        | 8                     | 11        | 6                     | 7         | 6                     | 7         | 5                     | 6         | 5                     | 8         | 5                     | 5         | 9                     | 11        |
| 11 | 5                     | 5         | 8                     | 10        | 11                    | 7         | 5                     | 5         | 7                     | 8         | NC                    | NC        | 2                     | 5         | 4                     | 4         | 8                     | 9         |
| 12 | 6                     | 6         | 8                     | 8         | 8                     | 9         | 6                     | 7         | 6                     | 9         | 7                     | 8         | 5                     | 6         | 4                     | 5         | 8                     | 9         |
| 13 | 8                     | 8         | 10                    | 10        | 10                    | 13        | 9                     | 10        | 8                     | 8         | 7                     | 10        | 7                     | 10        | 5                     | 5         | 9                     | 11        |
| 14 | 7                     | 7         | 7                     | 9         | 15                    | 15        | 8                     | 7         | 8                     | 10        | 6                     | 8         | 6                     | 10        | 5                     | 9         | 10                    | 10        |
| 15 | 5                     | 5         | 7                     | 7         | 10                    | 10        | 6                     | 8         | 5                     | 7         | 9                     | 10        | 5                     | 5         | 4                     | 4         | 8                     | 9         |
| 16 | 5                     | 5         | 11                    | 14        | 10                    | 15        | 6                     | 7         | 9                     | 12        | 13                    | 15        | 3                     | 6         | 8                     | 8         | 9                     | 18        |
| 17 | 10                    | 10        | 7                     | 7         | 5                     | 8         | 7                     | 7         | 7                     | 9         | 5                     | 7         | 0                     | 4         | 4                     | 4         | 10                    | 14        |
| 18 | 5                     | 5         | 15                    | 15        | 8                     | 9         | 6                     | 7         | 8                     | 8         | 6                     | 8         | 2                     | 5         | 4                     | 4         | 9                     | 10        |
| 19 | 6                     | 6         | 8                     | 7         | 7                     | 14        | 7                     | 9         | 7                     | 10        | 9                     | 11        | 3                     | 5         | 4                     | 4         | 11                    | 13        |
| 20 | 5                     | 5         | 7                     | 7         | 7                     | 10        | 7                     | 8         | 6                     | 8         | 8                     | 8         | 2                     | 5         | 5                     | 6         | 9                     | 10        |
| 21 | 8                     | 8         | 11                    | 11        | 13                    | 13        | 10                    | 12        | 8                     | 9         | 12                    | 10        | 7                     | 8         | 8                     | 9         | 13                    | 14        |
| 22 | 6                     | 6         | 10                    | 14        | 15                    | 15        | 17                    | 17        | 8                     | 10        | 15                    | 15        | 3                     | 4         | 7                     | 9         | 10                    | 16        |

|    |    |    |    |    |    |    |    |    |    |    |    |    |    |    |    |    |    |    |
|----|----|----|----|----|----|----|----|----|----|----|----|----|----|----|----|----|----|----|
| 23 | 10 | 10 | 11 | 10 | 12 | 15 | 10 | 8  | 10 | 8  | 10 | 8  | 14 | 15 | 10 | 10 | 14 | 16 |
| 24 | 12 | 12 | 7  | 11 | 7  | 12 | 6  | 12 | 6  | 8  | 5  | 18 | 3  | 15 | 5  | 7  | 8  | 11 |
| 25 | 10 | 10 | 11 | 11 | 10 | 13 | 11 | 11 | 7  | 8  | 12 | 12 | 5  | 12 | 14 | 14 | 13 | 13 |
| 26 | 5  | 5  | 9  | 9  | 7  | 12 | 7  | 15 | 7  | 6  | 13 | 15 | 4  | 10 | 6  | 9  | 9  | 11 |
| 27 | 5  | 5  | 7  | 7  | 7  | 9  | 6  | 6  | 6  | 6  | 7  | 8  | 5  | 6  | 6  | 6  | 9  | 10 |
| 28 | 6  | 6  | 7  | 9  | 6  | 7  | 7  | 8  | 6  | 6  | 8  | 11 | 3  | 4  | 5  | 5  | 8  | 9  |
| 29 | 5  | 5  | 7  | 7  | 5  | 5  | 5  | 5  | 7  | 7  | 8  | 8  | 0  | 2  | 6  | 6  | 8  | 8  |
| 30 | 5  | 5  | 9  | 9  | 7  | 7  | 6  | 6  | 6  | 6  | 6  | 6  | 2  | 4  | 6  | 6  | 8  | 9  |
| 31 | 11 | 11 | 11 | 13 | 12 | 14 | 10 | 12 | 8  | 9  | 10 | 12 | 15 | 15 | 14 | 14 | 12 | 13 |
| 32 | 15 | 15 | 15 | 15 | 15 | 15 | 18 | 20 | 7  | 6  | 18 | 18 | 2  | 20 | 14 | 14 | 8  | 8  |
| 33 | 7  | 7  | 8  | 8  | 7  | 7  | 7  | 7  | 6  | 6  | 6  | 6  | 5  | 5  | 5  | 6  | 9  | 9  |
| 34 | 5  | 5  | 7  | 7  | 6  | 12 | 5  | 18 | 6  | 6  | 8  | 17 | 5  | 6  | 5  | 7  | 9  | 9  |
| 35 | 8  | 8  | 9  | 9  | 9  | 12 | 7  | 8  | 7  | 8  | 8  | 9  | 8  | 10 | 7  | 8  | 11 | 12 |
| 36 | 10 | 10 | 12 | 12 | 9  | 10 | 11 | 11 | 9  | 9  | 13 | 13 | 15 | 16 | 12 | 12 | 10 | 12 |
| 37 | 10 | 10 | 8  | 10 | 7  | 7  | 9  | 10 | 7  | 8  | 7  | 9  | 5  | 5  | 5  | 5  | 9  | 8  |
| 38 | 12 | 12 | 7  | 7  | 13 | 15 | 7  | 9  | 8  | 9  | 10 | 12 | 7  | 15 | 10 | 10 | 8  | 9  |
| 39 | 7  | 7  | 7  | 7  | 7  | 7  | 18 | 18 | 8  | 8  | 5  | 6  | 5  | 5  | 5  | 5  | 9  | 9  |
| 40 | 6  | 6  | 7  | 7  | 8  | 9  | 7  | 9  | 7  | 8  | 7  | 8  | 0  | 5  | 4  | 4  | 10 | 10 |
| 41 | 6  | 6  | 7  | 9  | 5  | 10 | 6  | 7  | 7  | 6  | 12 | 10 | 2  | 5  | 5  | 6  | 8  | 11 |
| 42 | 10 | 10 | 8  | 8  | 12 | 12 | 13 | 12 | 10 | 11 | 8  | 13 | 0  | 7  | 9  | 9  | 10 | 12 |
| 43 | 7  | 7  | 7  | 7  | 6  | 6  | 6  | 6  | 6  | 7  | 6  | 6  | 3  | 4  | 4  | 4  | 9  | 9  |
| 44 | 10 | 10 | 7  | 9  | 10 | 10 | 10 | 9  | 8  | 8  | 8  | 8  | 0  | 7  | 6  | 6  | 11 | 11 |
| 45 | 10 | 5  | 14 | 14 | 13 | 13 | 17 | 18 | 12 | 14 | 14 | 14 | 15 | 12 | 12 | 12 | 13 | 13 |
| 46 | 5  | 5  | 7  | 7  | 5  | 7  | NC | NC | 6  | 6  | NC | NC | 0  | 3  | 4  | 4  | 8  | 9  |
| 47 | 5  | 5  | 7  | 7  | 8  | 11 | 6  | 7  | 6  | 7  | 6  | 7  | 2  | 4  | 5  | 5  | 9  | 10 |

48 8 8 8 9 8 10 7 7 8 7 7 8 5 7 6 6 8 8

---

**Supplementary Video 1.** Example of unamplified (left) and amplified (right) video capture. Written informed consent allowing publication of the participant's images was obtained.
